# Supplementary material for: Discovering a trans-omics biomarker signature that predisposes high risk diabetic patients to diabetic kidney disease
Source: Springer Nature journal article supplement (doi:10.1038/s41746-022-00713-7), 2022-11-02
Supplement: 41746_2022_713_MOESM1_ESM.pdf [file 41746_2022_713_MOESM1_ESM.pdf]

# Supplementary Information

## Discovery of a Trans-Omics Biomarker Signature that Predisposes High Risk Diabetic Patients to Diabetic Kidney Disease

I-Wen Wu<sup>1,2,3</sup>, Tsung-Hsien Tsai<sup>4</sup>, Chi-Jen Lo<sup>5</sup>, Yi-Ju Chou<sup>6</sup>, Chi-Hsiao Yeh<sup>2,3,7</sup>, Yun-Hsuan Chan<sup>4</sup>, Jun-Hong Chen<sup>4</sup>, Paul Wei-Che Hsu<sup>6</sup>, Heng-Chih Pan<sup>1,2</sup>, Heng-Jung Hsu<sup>1,2</sup>, Chun-Yu Chen<sup>1,2</sup>, Chin-Chan Lee<sup>1,2</sup>, Yu-Chiau Shyu<sup>2,8</sup>, Chih-Lang Lin<sup>2,9</sup>, Mei-Ling Cheng<sup>5,10,11</sup>, Chi-Chun Lai<sup>2,3,12\*</sup>, Huey-Kang Sytwu<sup>13,14\*</sup>, Ting-Fen Tsai<sup>6,15,16\*</sup>

<sup>1</sup>Department of Nephrology, Chang Gung Memorial Hospital, Keelung 204, Taiwan;

<sup>2</sup>Community Medicine Research Center, Chang Gung Memorial Hospital, Keelung 204, Taiwan;

<sup>3</sup>College of Medicine, Chang Gung University, Taoyuan 333, Taiwan;

<sup>4</sup>Advanced Tech BU, Acer Inc., New Taipei City 221, Taiwan;

<sup>5</sup>Metabolomics Core Laboratory, Healthy Aging Research Center, Chang Gung University, Taoyuan City 333, Taiwan;

<sup>6</sup>Institute of Molecular and Genomic Medicine, National Health Research Institutes, Zhunan 350, Taiwan;

<sup>7</sup>Department of Thoracic and Cardiovascular Surgery, Chang Gung Memorial Hospital, Linkou 333, Taiwan;

<sup>8</sup>Department of Nursing, Chang Gung University of Science and Technology, Taoyuan 333, Taiwan;

<sup>9</sup>Department of Gastroenterology and Hepatology, Chang Gung Memorial Hospital, Keelung 204, Taiwan;

<sup>10</sup>Clinical Metabolomics Core Laboratory, Chang Gung Memorial Hospital, Taoyuan City 33302, Taiwan.

<sup>11</sup>Department of Biomedical Sciences, College of Medicine, Chang Gung University, Taoyuan City 33302, Taiwan.

<sup>12</sup>Department of Ophthalmology, Chang Gung Memorial Hospital, Keelung 204, Taiwan

<sup>13</sup>National Institute of Infectious Diseases and Vaccinology, National Health Research Institutes, Zhunan 350, Taiwan

<sup>14</sup>Department & Graduate Institute of Microbiology and Immunology, National Defense Medical Center, Taipei 114, Taiwan;

<sup>15</sup>Department of Life Sciences and Institute of Genome Sciences, National Yang Ming Chiao Tung University, Taipei 112, Taiwan;

<sup>16</sup>Center for Healthy Longevity and Aging Sciences, National Yang Ming Chiao Tung University, Taipei 112, Taiwan

Correspondence: chichun.lai@gmail.com (C.-C.L.); sytwu@nhri.edu.tw (H.-K.S.); tftsai@ym.edu.tw (T.-F.T.); Tel.: +886-2-24313131 ext. 6101 (C.-C.L.); +886-37-206166 ext. 31010 (H.-K.S.); +886-2-28267293 (T.-F.T.)

# Supplementary Tables

**Supplementary Tables 1. Baseline characteristics of training cohort and testing cohort**

| Parameters                                  | All<br>(n = 796)     | Training<br>cohort<br>(n = 557) | Testing<br>cohort<br>(n = 61) | Validation<br>cohort<br>(n=178) |
|---------------------------------------------|----------------------|---------------------------------|-------------------------------|---------------------------------|
| Age, years                                  | 63.1 ± 13.2          | 64.0 ± 12.7                     | 62.2 ± 14.3                   | 60.6 ± 14.2                     |
| Male, No. (%)                               | 367 (46.1%)          | 259 (46.5%)                     | 28 (45.9%)                    | 80 (44.9%)                      |
| <b>Comorbidities</b>                        |                      |                                 |                               |                                 |
| Diabetes, No. (%)                           | 263 (33.0%)          | 187 (33.6%)                     | 20 (32.8%)                    | 56 (31.5%)                      |
| Hypertension, No. (%)                       | 328 (41.2%)          | 247 (44.3%)                     | 21 (34.4%)                    | 60 (33.7%)                      |
| Obesity, No. (%)                            | 537 (67.5%)          | 406 (72.9%)                     | 35 (57.4%)                    | 96 (53.9%)                      |
| <b>Personal habits</b>                      |                      |                                 |                               |                                 |
| Smoking, No. (%)                            | 190 (23.9%)          | 147 (26.4%)                     | 20 (32.8%)                    | 23 (12.9%)                      |
| Alcohol drinking, No. (%)                   | 250 (31.4%)          | 190 (34.1%)                     | 26 (42.6%)                    | 34 (19.1%)                      |
| <b>Anthropometrics</b>                      |                      |                                 |                               |                                 |
| Body mass index, kg/m <sup>2</sup>          | 26.3 ± 4.3           | 26.6 ± 4.0                      | 26.9 ± 4.9                    | 25.2 ± 4.6                      |
| Systolic BP, mmHg                           | 134.1 ± 45.1         | 133.8 ± 17.4                    | 132.7 ± 17.4                  | 135.6 ± 90.1                    |
| Diastolic BP, mmHg                          | 77.2 ± 11.0          | 77.8 ± 11.1                     | 77.6 ± 10.4                   | 75.4 ± 10.9                     |
| <b>Laboratory</b>                           |                      |                                 |                               |                                 |
| eGFR, mL/min per 1.73 m <sup>2</sup> (MDRD) | 83.4 (0.4, 171.7)    | 82.8 (8.6, 171.7)               | 86.0 (11.9, 145.9)            | 84.1 (0.4, 157.3)               |
| BUN, mg/dL                                  | 15.4 (0.7, 129.0)    | 15.6 (6.3, 54.6)                | 15.0 (5.8, 75.4)              | 14.0 (0.7, 129.0)               |
| Serum creatinine, mg/dL                     | 0.8 (0.4, 100.6)     | 0.8 (0.4, 6.9)                  | 0.8 (0.5, 4.7)                | 0.8 (0.4, 100.6)                |
| Serum albumin, g/dL                         | 4.6 (0.7, 246.4)     | 4.6 (3.1, 246.4)                | 4.6 (3.6, 5.3)                | 4.5 (0.7, 5.2)                  |
| Cholesterol, mg/dL                          | 188 (4, 377)         | 187 (92, 377)                   | 191 (99, 279)                 | 189 (4, 313)                    |
| Triglycerides, mg/dL                        | 116 (21, 1225)       | 121 (25, 1225)                  | 119 (35, 409)                 | 99 (21, 530)                    |
| hs-CRP, mg/L                                | 1.1 (0.1, 73.1)      | 1.1 (0.2, 73.1)                 | 1.0 (0.1, 59.6)               | 1.3 (0.2, 66.0)                 |
| Urine albumin/creatinine ratio, mg/g        | 9.9 (0.9, 5708.6)    | 10.4 (1.3, 2085.0)              | 7.9 (2.1, 3792.1)             | 6.9 (0.9, 5708.6)               |
| Vitamin D, ug/mL                            | 580.1 (22.3, 3499.0) | 572.5 (22.3, 3442.0)            | 530.9 (114.0, 3374.0)         | 609.4 (159.6, 3499.0)           |
| iPTH, pmol/L                                | 42.0 (6.0, 199.0)    | 42.3 (6.0, 199.0)               | 40.4 (17.4, 99.9)             | 42.0 (13.7, 195.0)              |
| Serum calcium, mg/dL                        | 9.4 (6.6, 10.5)      | 9.4 (6.6, 10.5)                 | 9.4 (8.1, 10.2)               | 9.4 (8.1, 10.4)                 |
| Serum phosphate, mg/dL                      | 3.6 (2.1, 5.7)       | 3.6 (2.1, 5.7)                  | 3.6 (2.8, 4.8)                | 3.6 (2.3, 5.2)                  |
| Insulin, uU/mL                              | 10.4 (0.5, 176.0)    | 11.0 (1.2, 84.9)                | 10.3 (0.5, 43.5)              | 8.2 (1.5, 176.0)                |
| LDL-C / HDL-C, mg/dL                        | 2.2 (0.6, 5.9)       | 2.3 (0.6, 5.9)                  | 2.5 (0.8, 4.6)                | 2.1 (0.6, 4.5)                  |
| UreaNU, mg/dL                               | 794.2 (1.6, 1923.3)  | 829.2 (117.6, 1923.3)           | 751.7 (152.7, 1546.7)         | 712.9 (1.6, 1652.0)             |
| Glycated Hemoglobin, %                      | 5.9 (4.5, 106.0)     | 6.0 (4.5, 14.4)                 | 5.9 (4.8, 11.1)               | 5.8 (4.7, 106.0)                |
| Glucose, mg/dL                              | 100.0 (67.0, 400.0)  | 102.0 (69.0, 400.0)             | 99.0 (82.0, 218.0)            | 96.0 (67.0, 393.0)              |
| <b>Grouping</b>                             |                      |                                 |                               |                                 |
| Normal control, No. (%)                     | 438 (55.0%)          | 302 (54.2%)                     | 36 (59.0%)                    | 100 (56.2%)                     |
| Diabetes, No. (%)                           | 132 (16.6%)          | 96 (17.2%)                      | 10 (16.4%)                    | 26 (14.6%)                      |
| Non-diabetic CKD, No. (%)                   | 95 (11.9%)           | 68 (12.2%)                      | 5 (8.2%)                      | 22 (12.4%)                      |
| Diabetic kidney disease, No. (%)            | 131 (16.5%)          | 91 (16.3%)                      | 10 (16.4%)                    | 30 (16.9%)                      |

The values are expressed as means ± SD or median (Min, Max) or n (%). Abbreviations: CKD, chronic kidney disease; BUN, blood urea nitrogen; eGFR, estimated glomerular filtration rate; hs-C reactive protein, high-sensitivity C reactive protein; LDL-C / HDL-C, low density lipoprotein-cholesterol / high density lipoprotein-cholesterol.

**Supplemental Table 2. Feature Importance for predicting DM (model 1)**

| Rank | Feature               | Category   | Comment                                    |
|------|-----------------------|------------|--------------------------------------------|
| 1    | Acetylcarnitine       | Metabolite | carnitine                                  |
| 2    | Fucose                | Metabolite | hexose                                     |
| 3    | Mannose/Inositol I    | Metabolite | Aldohexose                                 |
| 4    | Age                   | Clinical   |                                            |
| 5    | Sulfanilamide         | Metabolite | drug                                       |
| 6    | Proline               | Lipidomic  | Amino acid                                 |
| 7    | Insulin               | Clinical   |                                            |
| 8    | LDL-C-direct-         | Clinical   |                                            |
| 9    | PC <sub>ae</sub> 34:2 | Lipidomic  | plasmalogen                                |
| 10   | lysoPC 18:0           | Lipidomic  | lyso-phospholipid                          |
| 11   | Serine                | Lipidomic  | Amino acid                                 |
| 12   | Sarcosine             | Lipidomic  | Biogenic amine                             |
| 13   | Valerylcarnitine      | Lipidomic  | carnitine                                  |
| 14   | Alanine               | Lipidomic  | Amino acid                                 |
| 15   | PC <sub>ae</sub> 38:6 | Lipidomic  | plasmalogen                                |
| 16   | Aspartate             | Lipidomic  | Amino acid                                 |
| 17   | rs3755899             | SNP        | Non Coding Transcript Variant:<br>UGDH-AS1 |
| 18   | Propionylcarnitine    | Lipidomic  | carnitine                                  |
| 19   | rs933229              | SNP        | Intron Variant: LOC105373021               |
| 20   | PC <sub>ae</sub> 32:2 | Lipidomic  | plasmalogen                                |

**Supplemental Table 3. Feature Importance for predicting CKD in DM patients (model 2)**

| Rank | Feature                    | Category   | Comment        |
|------|----------------------------|------------|----------------|
| 1    | Serine                     | Lipidomic  | Amino acid     |
| 2    | Resolvin D1                | Metabolite |                |
| 3    | Pseudouridine              | Metabolite |                |
| 4    | Kynurenine                 | Lipidomic  | Biogenic amine |
| 5    | Arabitol                   | Metabolite |                |
| 6    | PC ae C30:0                | Lipidomic  |                |
| 7    | Symmetric dimethylarginine | Lipidomic  | Biogenic amine |
| 8    | rs1868138                  | SNP        | ALDH1L1        |
| 9    | rs184518892                | SNP        | LY6D           |
| 10   | rs117681509                | SNP        | PCDH9          |

**Supplemental Table 4. Feature Importance for predicting CKD in non-DM patients (model 3)**

| Rank | Feature                     | Category   | Comment                     |
|------|-----------------------------|------------|-----------------------------|
| 1    | Mannose/Inositol II         | Metabolite | hexose                      |
| 2    | Symmetric dimethylarginine  | Lipidomic  | plasmalogen                 |
| 3    | Kynurenine                  | Lipidomic  | Biogenic amine              |
| 4    | Mannose/Inositol I          | Metabolite | hexose                      |
| 5    | Uridine                     | Metabolite | pyrimidine nucleoside       |
| 6    | Alanine                     | Metabolite | Amino acid                  |
| 7    | Citrulline                  | Lipidomic  | Amino acid                  |
| 8    | Acetyl neuraminic acid      | Metabolite | Neuraminic acid             |
| 9    | Cystine                     | Metabolite | Amino acid                  |
| 10   | rs898097                    | SNP        | Intron Variant: B3GNTL1     |
| 11   | Asymmetric dimethylarginine | Lipidomic  | Biogenic amine              |
| 12   | Age                         | Clinical   |                             |
| 13   | rs11097023                  | SNP        | Intron Variant: CDS1        |
| 14   | Acetylcarnitine             | Lipidomic  | carnitine                   |
| 15   | rs2856966                   | SNP        | Missense Variant: ADCYAP1   |
| 16   | Mannitol                    | Metabolite | drug                        |
| 17   | Serine                      | Lipidomic  | Amino acid                  |
| 18   | rs28533579                  | SNP        | Intron Variant: FAM53A      |
| 19   | PC <sub>ae</sub> 30:2       | Lipidomic  | plasmalogen                 |
| 20   | Butyrylcarnitine            | Lipidomic  | carnitine                   |
| 21   | rs12451753                  | SNP        | Synonymous Variant: CCDC182 |
| 22   | Cysteic acid                | Metabolite | taurine metabolism          |
| 23   | PC <sub>ae</sub> 36:2       | Lipidomic  | plasmalogen                 |
| 24   | PC <sub>aa</sub> 36:0       | Lipidomic  | phosphatidylcholine         |
| 25   | BMI                         | Clinical   |                             |

**Supplementary Table 5. Cross-validation of prediction performance in Model 1**

|               | Model                             | Target    | Sensitivity | Specificity | PPV         | NPV         | Accuracy    | AUC         | Cut Point |
|---------------|-----------------------------------|-----------|-------------|-------------|-------------|-------------|-------------|-------------|-----------|
| <b>Model1</b> | <b>Extremely Randomized Trees</b> |           | <b>0.72</b> | <b>0.88</b> | <b>0.75</b> | <b>0.86</b> | <b>0.83</b> | <b>0.89</b> |           |
|               | Logistic Regression               |           | 0.76        | 0.83        | 0.69        | 0.87        | 0.80        | 0.87        |           |
|               | Random Forest                     | <b>DM</b> | 0.73        | 0.86        | 0.73        | 0.87        | 0.82        | 0.88        | 0.5       |
|               | Extreme Gradient Boosting         |           | 0.74        | 0.84        | 0.70        | 0.86        | 0.81        | 0.88        |           |
|               | Support Vector Machine            |           | 0.75        | 0.83        | 0.69        | 0.87        | 0.81        | 0.88        |           |

**Supplementary Table 6. Cross-validation of prediction performance in Model 2**

|               | Model                      | Target     | Sensitivity | Specificity | PPV         | NPV         | Accuracy    | AUC         | Cut Point |
|---------------|----------------------------|------------|-------------|-------------|-------------|-------------|-------------|-------------|-----------|
| <b>Model2</b> | Extremely Randomized Trees |            | 0.64        | 0.72        | 0.70        | 0.67        | 0.68        | 0.73        |           |
|               | Logistic Regression        |            | 0.63        | 0.81        | 0.77        | 0.69        | 0.72        | 0.74        |           |
|               | Random Forest              | <b>CKD</b> | 0.69        | 0.64        | 0.66        | 0.67        | 0.67        | 0.71        | 0.5       |
|               | Extreme Gradient Boosting  |            | 0.64        | 0.69        | 0.67        | 0.66        | 0.67        | 0.72        |           |
|               | Support Vector Machine     |            | 0.67        | 0.73        | 0.71        | 0.69        | 0.70        | 0.77        |           |
|               | <b>Ensemble (Mean)</b>     |            | <b>0.67</b> | <b>0.73</b> | <b>0.71</b> | <b>0.69</b> | <b>0.70</b> | <b>0.76</b> |           |

**Supplementary Table 7. Cross-validation of prediction performance in Model 3**

|               | Model                             | Target | Sensitivity | Specificity | PPV         | NPV         | Accuracy    | AUC         | Cut Point |
|---------------|-----------------------------------|--------|-------------|-------------|-------------|-------------|-------------|-------------|-----------|
| <b>Model3</b> | <b>Extremely Randomized Trees</b> |        | <b>0.47</b> | <b>0.90</b> | <b>0.50</b> | <b>0.89</b> | <b>0.82</b> | <b>0.76</b> |           |
|               | Logistic Regression               |        | 0.59        | 0.79        | 0.38        | 0.9         | 0.75        | 0.76        |           |
|               | Random Forest                     | CKD    | 0.38        | 0.91        | 0.48        | 0.87        | 0.82        | 0.77        | 0.5       |
|               | Extreme Gradient Boosting         |        | 0.42        | 0.88        | 0.42        | 0.88        | 0.79        | 0.76        |           |
|               | Support Vector Machine            |        | 0.55        | 0.79        | 0.37        | 0.89        | 0.75        | 0.75        |           |



**Supplementary Table 9. Expression levels of mRNA of candidate genes**

| Model                                                                          | Gene Symbol    | Gene Name                                                          | Expression Level of mRNA* (NX) |          |       |         |       |                                          |
|--------------------------------------------------------------------------------|----------------|--------------------------------------------------------------------|--------------------------------|----------|-------|---------|-------|------------------------------------------|
|                                                                                |                |                                                                    | kidney                         | pancreas | liver | adipose | heart | others                                   |
| <b>Model 1<br/>Feature<br/>associated with<br/>DM</b>                          | <b>RPTOR</b>   | Regulatory-Associated Protein Of MTOR                              | 14.3                           | 9.8      | 12.9  | 13.6    | 15.5  | ubiquitous                               |
|                                                                                | <b>CLPTM1L</b> | Cleft Lip And Palate Transmembrane Protein 1-Like Protein          | 29.4                           | 57.6     | 56.1  | 15.8    | 13.1  | ubiquitous                               |
| <b>Model 2<br/>Features<br/>associated with<br/>CKD in DM<br/>patients</b>     | <b>ALDH1L1</b> | Aldehyde Dehydrogenase 1 Family Member L1                          | 48.1                           | 10.2     | 148.7 | 28.9    | 8.1   | salivary gland (34.1)                    |
|                                                                                | <b>LY6D</b>    | Lymphocyte Antigen 6 Family Member D                               | 0.2                            | 0.2      | 0.2   | 0.2     | 0.2   | tongue (316.2), esophagus (236.9)        |
|                                                                                | <b>PCDH9</b>   | Protocadherin 9                                                    | 3.5                            | 2.0      | 2.3   | 4.5     | 5.7   | cerebral cortex (47.0)                   |
| <b>Model 3<br/>Features<br/>associated with<br/>CKD in non-DM<br/>patients</b> | <b>B3GNTL1</b> | UDP-GlcNAc:BetaGal Beta-1,3-N-Acetylglucosaminyltransferase Like 1 | 2.9                            | 7.6      | 3.4   | 3.7     | 6.2   | Ubiquitous                               |
|                                                                                | <b>CDS1</b>    | CDP-Diacylglycerol Synthase 1                                      | 11.9                           | 4.5      | 0.6   | 0.9     | 0.5   | Small intestine (48.0)                   |
|                                                                                | <b>ADCYAP1</b> | Adenylate Cyclase Activating Polypeptide 1                         | 0.6                            | 7.7      | 0.3   | 2.1     | 1.0   | pons and medulla (33.8), appendix (16.5) |
|                                                                                | <b>FAM53A</b>  | Family With Sequence Similarity 53 Member A                        | 0.7                            | 4.0      | 1.2   | 1.3     | 0.5   | testis (12.7)                            |

\*NX is a normalized expression value from consensus data by databases HPA, GTEx and FANTOM5. After obtaining consensus expression by calculating TPM (transcripts per million), the value is obtained after processing through TMM normalized and Pareto scaling. Data source: The Human Protein Atlas <https://www.proteinatlas.org>.

**Supplementary Table 10. Expression levels of protein of candidate genes.**

| Model                                                                          | Gene Symbol    | Gene Name                                                          | Expression Level of Protein* |              |              |              |              |                    |
|--------------------------------------------------------------------------------|----------------|--------------------------------------------------------------------|------------------------------|--------------|--------------|--------------|--------------|--------------------|
|                                                                                |                |                                                                    | kidney                       | pancreas     | liver        | adipose      | heart        | others             |
| <b>Model 1<br/>Feature<br/>associated with<br/>DM</b>                          | <b>RPTOR</b>   | Regulatory-Associated Protein Of MTOR                              | High                         | Medium       | Low          | Medium       | Medium       | Ubiquitous         |
|                                                                                | <b>CLPTM1L</b> | Cleft Lip And Palate Transmembrane Protein 1-Like Protein          | Medium                       | High         | Medium       | Not detected | Not detected | Stomach, Testis    |
| <b>Model 2<br/>Features<br/>associated with<br/>CKD in DM<br/>patients</b>     | <b>ALDH1L1</b> | Aldehyde Dehydrogenase 1 Family Member L1                          | High                         | Low          | High         | Medium       | Low          | Cerebellum, Testis |
|                                                                                | <b>LY6D</b>    | Lymphocyte Antigen 6 Family Member D                               | Not detected                 | Not detected | Not detected | Not detected | Not detected | Esophagus, Skin    |
|                                                                                | <b>PCDH9</b>   | Protocadherin 9                                                    | -                            | -            | -            | -            | -            | -                  |
| <b>Model 3<br/>Features<br/>associated with<br/>CKD in non-DM<br/>patients</b> | <b>B3GNTL1</b> | UDP-GlcNAc:BetaGal Beta-1,3-N-Acetylglucosaminyltransferase Like 1 | Medium                       | Medium       | Not detected | Low          | Medium       | Testis             |
|                                                                                | <b>CDS1</b>    | CDP-Diacylglycerol Synthase 1                                      | Low                          | Low          | Not detected | Low          | Medium       | Cerebellum         |
|                                                                                | <b>ADCYAP1</b> | Adenylate Cyclase Activating Polypeptide 1                         | Not detected                 | Not detected | Not detected | Not detected | Not detected | Pituitary gland    |
|                                                                                | <b>FAM53A</b>  | Family With Sequence Similarity 53 Member A                        | Medium                       | Low          | Not detected | Low          | Low          | Testis             |

# Supplementary Figures

## Supplementary Figure 1

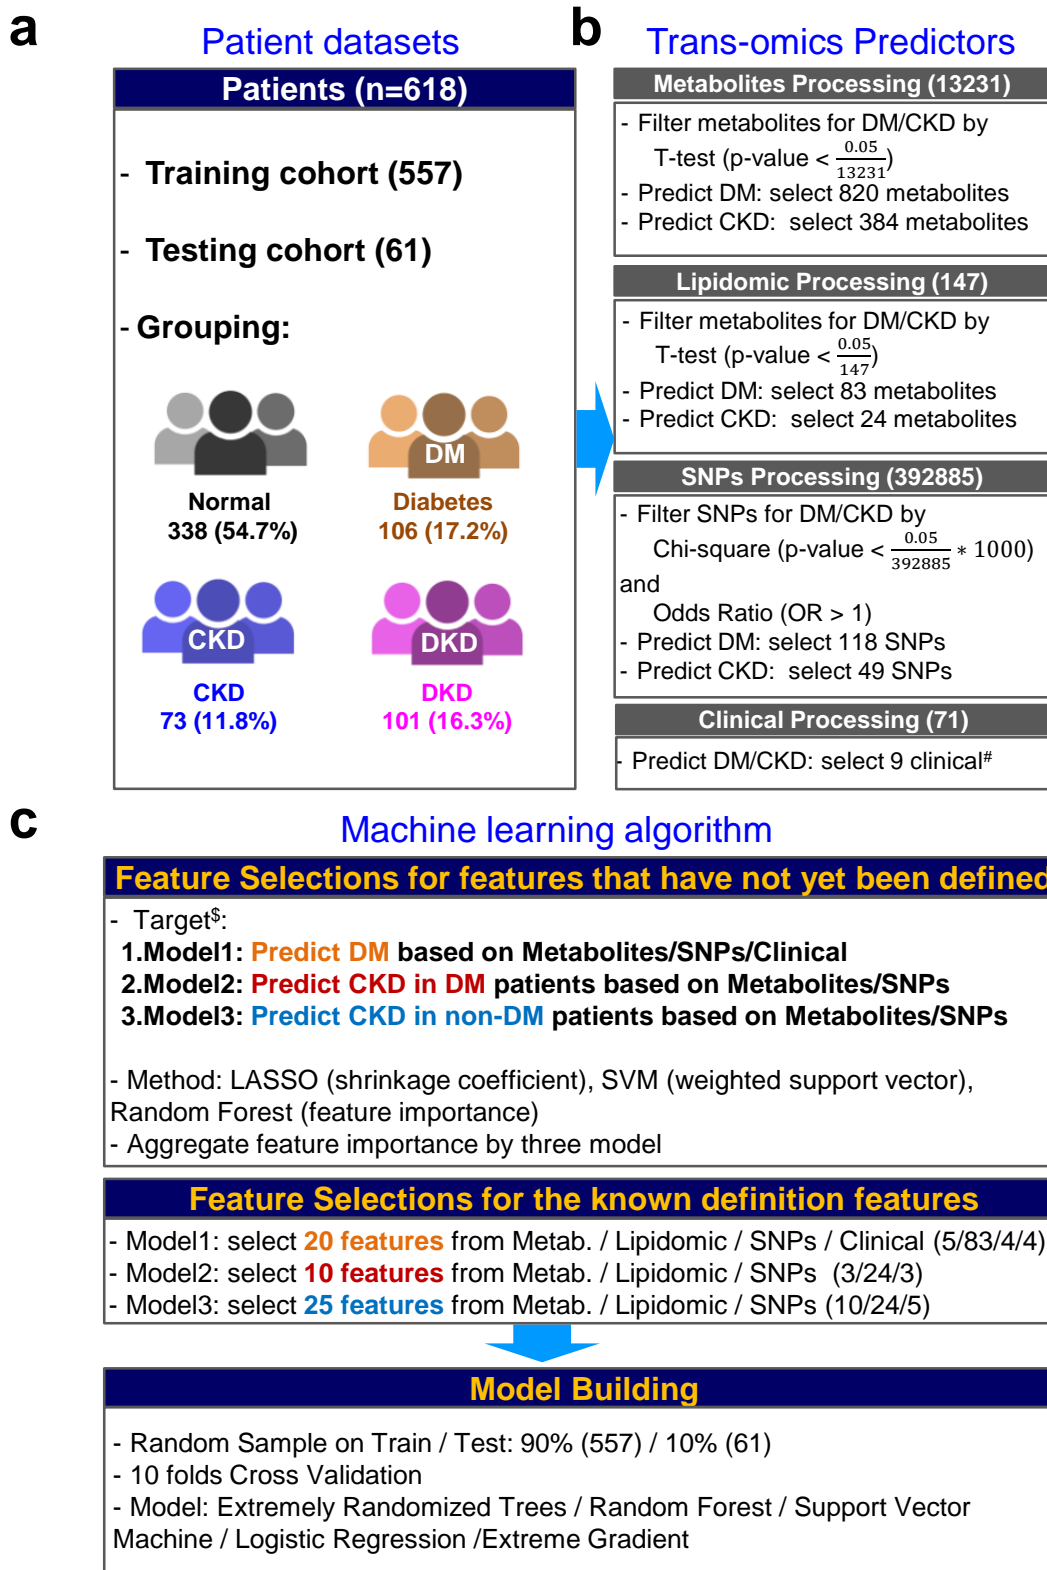

**Supplementary Figure 1. Study flow chart, machine learning algorithms and their performances in the three predicting models. (a) (b)** Data processing workflows for the integrated analyses of un-target metabolites, lipidomics (P180-metabolites), SNPs, and clinical data. The metabolites contains 13231 un-target metabolites and the Lipidomic recruits 147 known metabolites from the P180 kits. # indicates the 9 clinical features selected by AI, namely Age, BMI, Gender, BUN, Insulin, Intact\_PTH, LDL\_C\_direct, T\_Cholesterol, and UreaNU. **(c)** Machine learning algorithm for the selections of best features and model building for the three models. § indicates that Age and BMI must be the input features of Model 1, 2, 3 for feature selections.

## Supplementary Figure 2

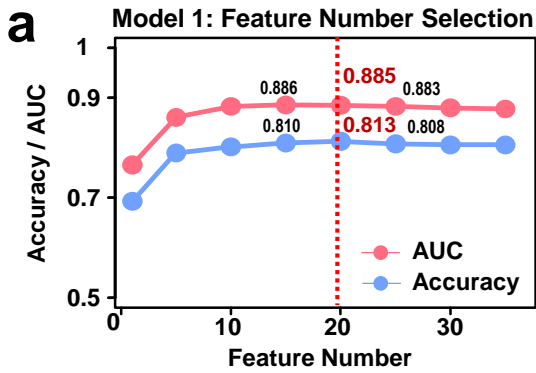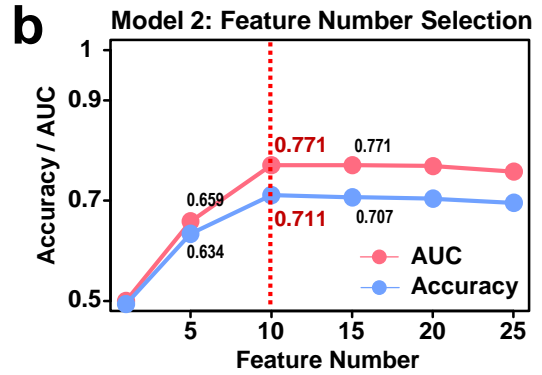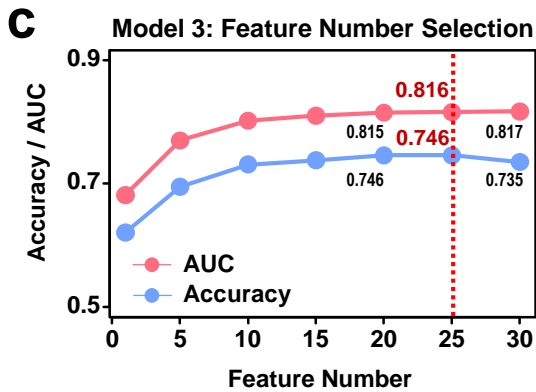

Supplementary Figure 2. The number of feature selection was determined by AUC and accuracy. (a) Model 1 (20 features), (b) Model 2 (10 features), and (c) Model 3 (25 features).



# Supplementary Figure 3

**a**

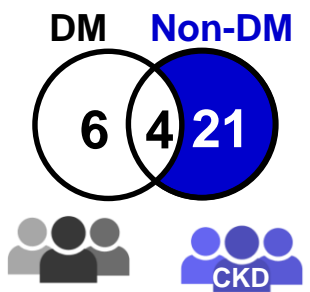

- Clinical**
  - Age
  - BMI
- SNPs**
  - B3GNTL1
  - CDS1
  - ADCYAP1
  - FAM53A
  - CCDC182
- Metabolites**
  - Mannose/Inositol II
  - Mannose/Inositol I
  - Alanine
  - Citrulline
  - Acetyl neuraminic acid
  - Cystine
  - Asymmetric dimethylarginine
  - Acetylcarnitine
  - Mannitol
  - PC ae C30:2
  - Butyrylcarnitine
  - Cysteic acid
  - PC ae C36:2
  - PC aa C36:0

**b**

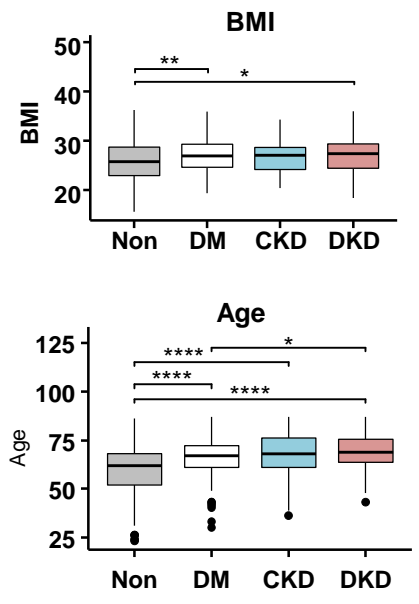

**c**

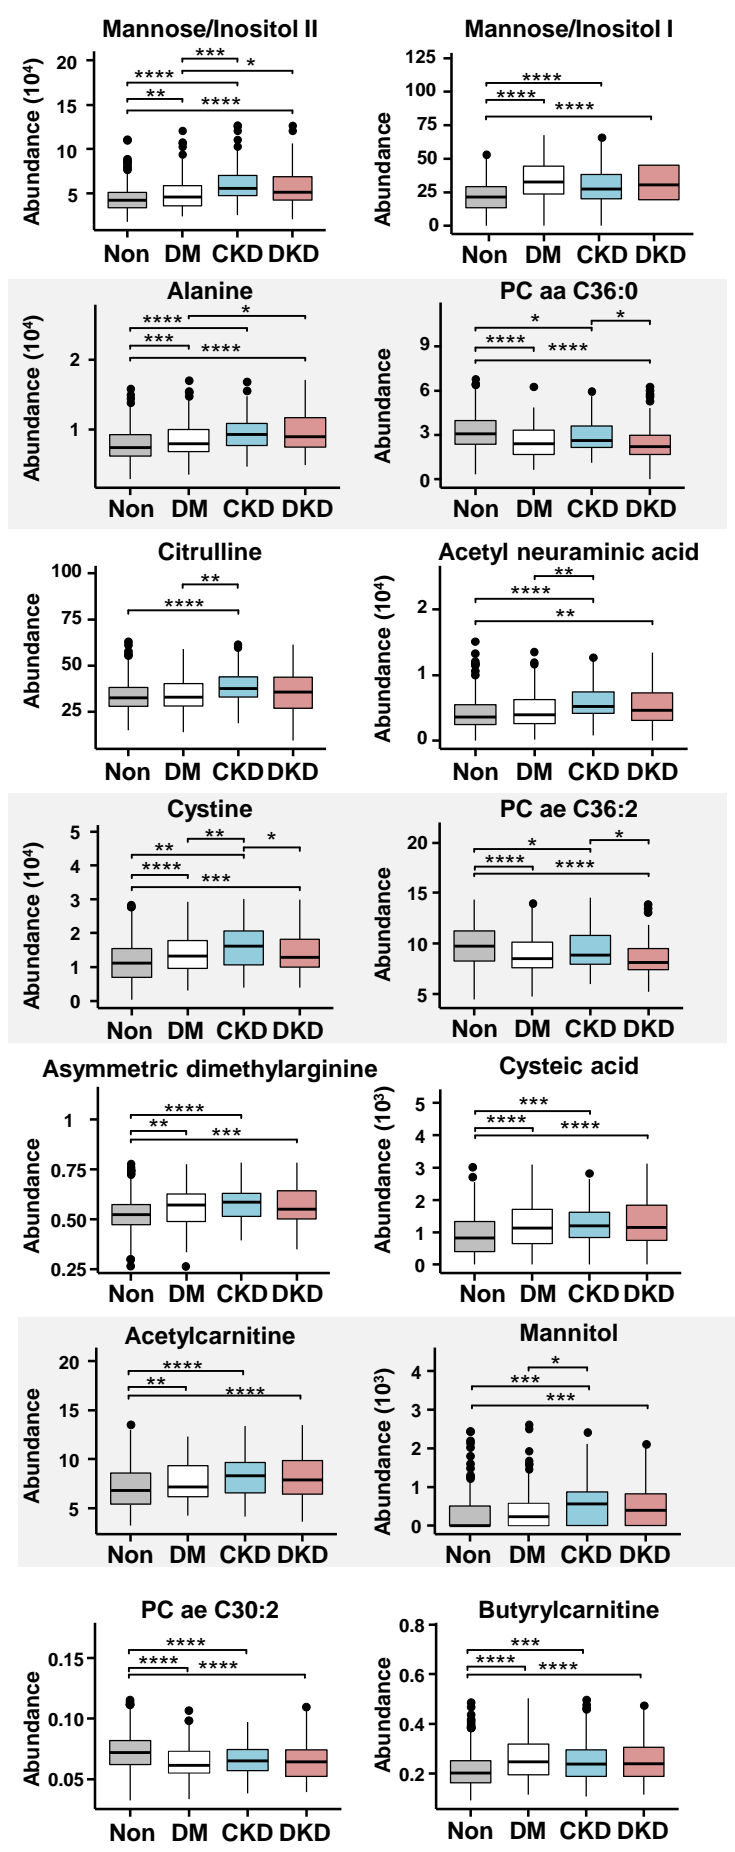

# Supplementary Figure 3 (continued)

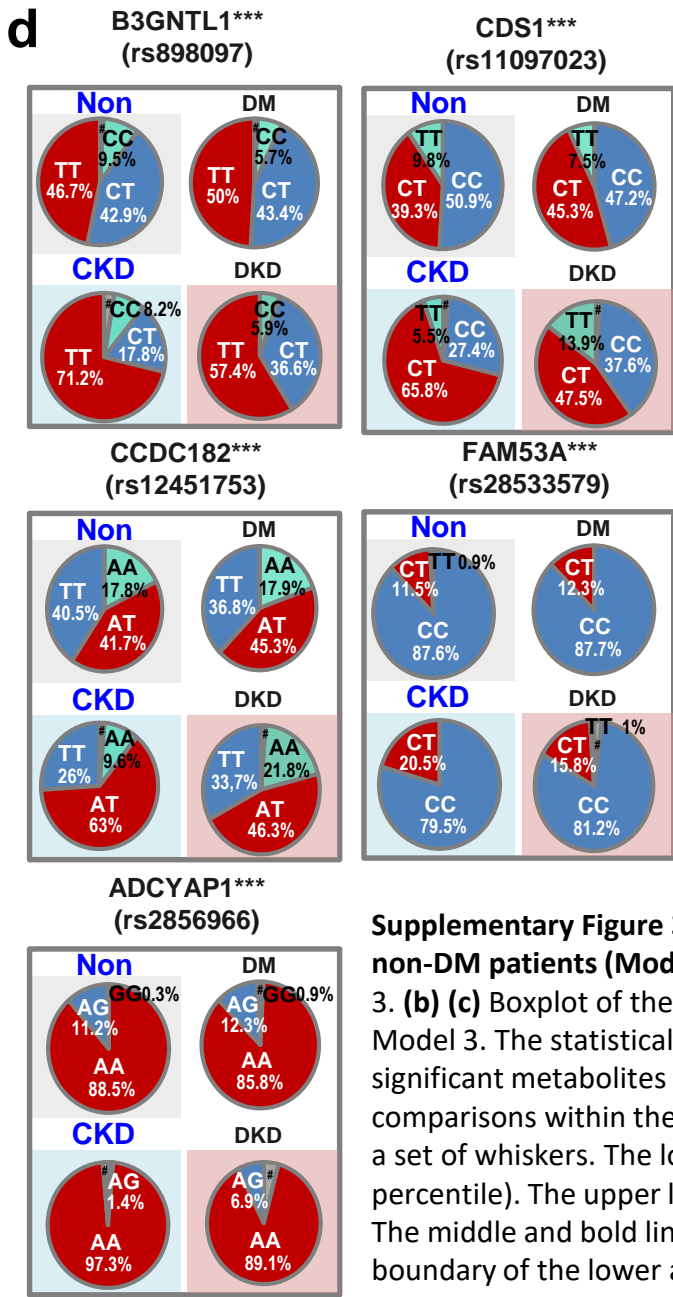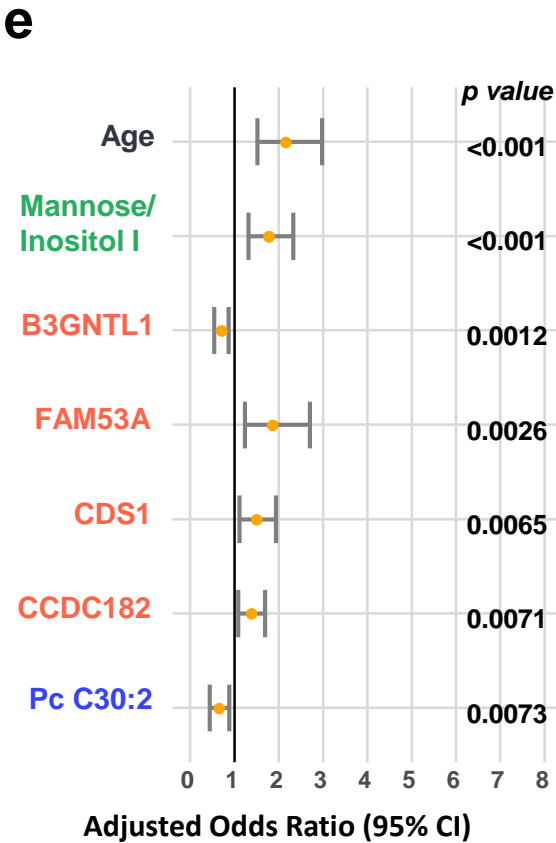

**Supplementary Figure 3. Selected features for predicting renal dysfunction in non-DM patients (Model 3).** (a) Venn diagram of AI-selected features in model 3. (b) (c) Boxplot of the clinical features (b) and the metabolite features (c) in Model 3. The statistical analysis with *p*-values was performed by ANOVA for significant metabolites in the four groups. The t-test was used for multiple comparisons within the four groups test. Box plot: Box plot includes a box and a set of whiskers. The lower line of the box is represented as Q1 (25th percentile). The upper line of the box is represented as Q3 (75th percentile). The middle and bold line in the box is represented as median. In general, the boundary of the lower and upper whiskers is 1.5 interquartile ranges (IQR, IQR = Q3 - Q1) below the Q1 and 1.5 IQR above the Q3. The extreme values outside this boundary are considered as outliers and plotted as black dots. If all data points are between Q1 - 1.5 x IQR and Q3 + 1.5 x IQR, the boundary of the lower and upper whiskers should be minimum and maximum of the data. The error bar here means the lower and upper whiskers that we define above. (d) Pie charts indicating the genotype frequencies of SNPs using SNP datasets obtained from the subjects. # indicated the signaling of SNP array was lower than the calling rates. The  $\chi^2$  test was used for comparisons of genotype frequencies within the four groups. (e) Adjusted odds ratios of factors in backward logistic regression procedure associated with the occurrence of CKD in non-DM patients. The Wald test was used to construct 95% confidence interval (CI) and test the significance of adjusted odds ratios of risk factors. The error bar here means the lower bound and upper bound of adjusted odds ratio of 95% confidence interval. \**p* < 0.05, \*\**p* < 0.01, \*\*\**p* < 0.001, \*\*\*\**p* < 0.0001. Abbreviations: B3GNTL1, UDP-GlcNAc:BetaGalBeta-1,3-N-Acetylglucosaminyltransferase like 1; CDS1, CDP-Diacylglycerol synthase 1; CCDC182, coiled-coil domain containing 182; FAM53A, family with sequence similarity 53 member A; ADCYAP1, adenylate cyclase activating polypeptide 1.

# Supplementary Figure 4

**a**

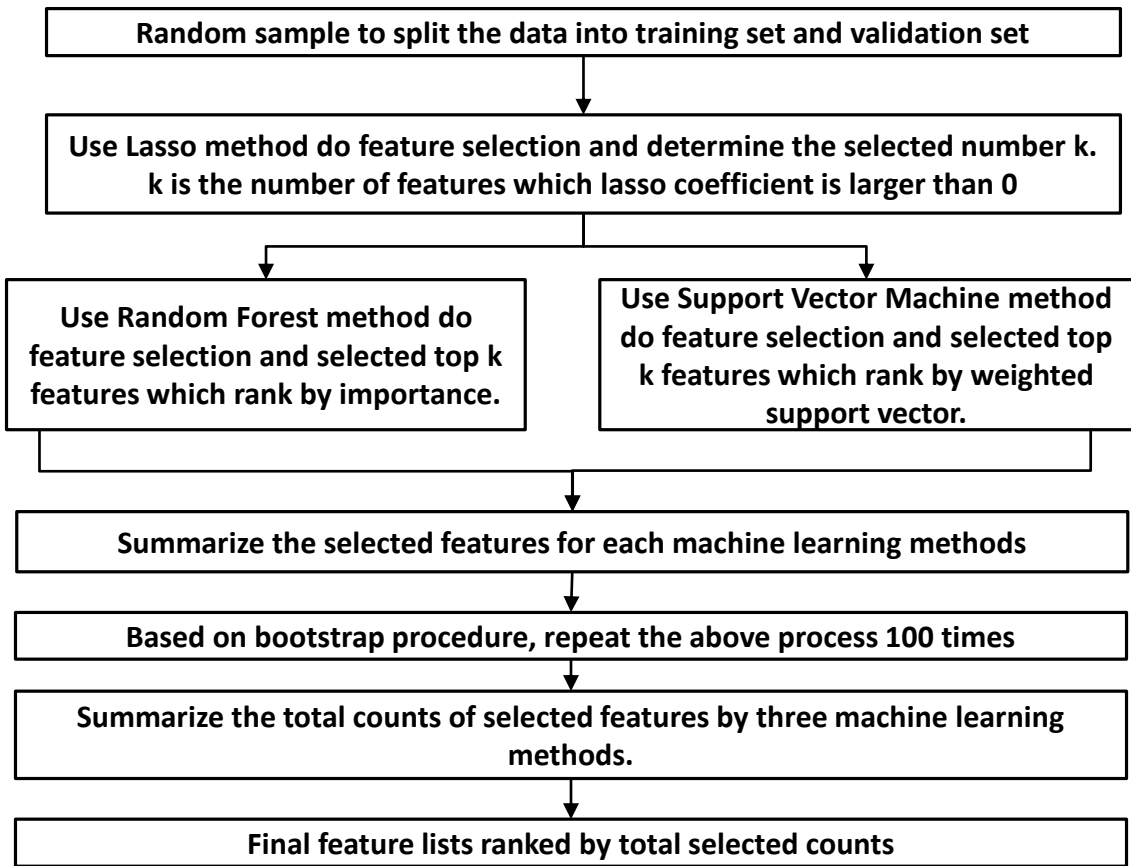

**b**

**Bootstrap the process 100 times**

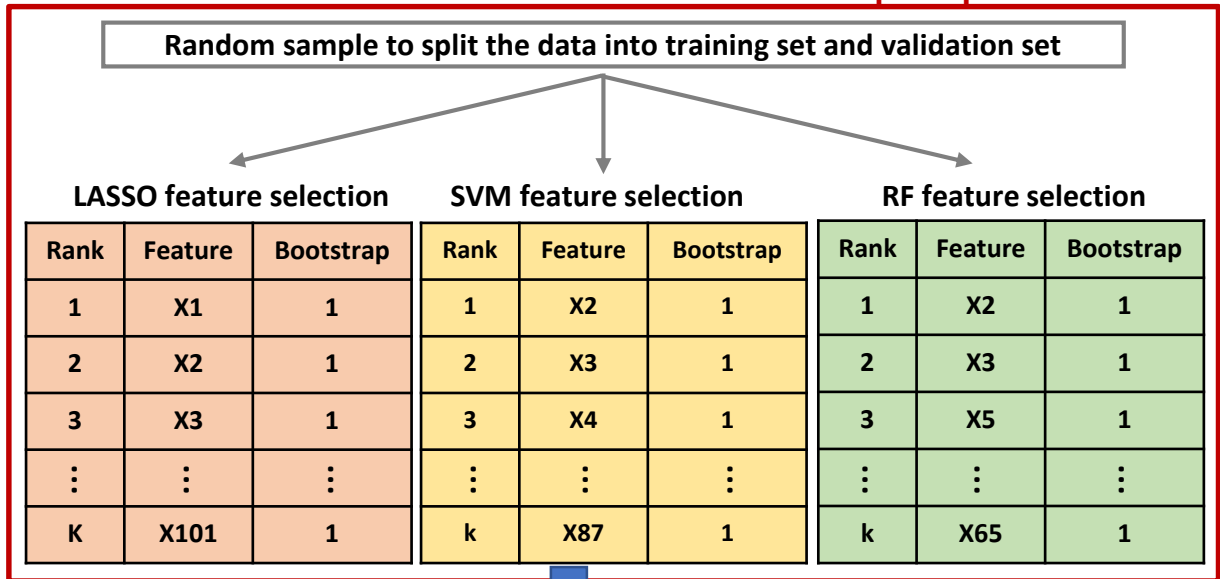

| Rank | Feature | Selection count |
|------|---------|-----------------|
| 1    | X2      | 298             |
| 2    | X3      | 295             |
| 3    | X1      | 288             |
| 4    | X15     | 283             |
| ⋮    | ⋮       | ⋮               |

**Aggregate feature selection  
By ranking selection count**

Max of selection count =  
100(times)\*3(method)=300

# Supplementary Figure 4 (continued)

**C**

## Integrated ROC

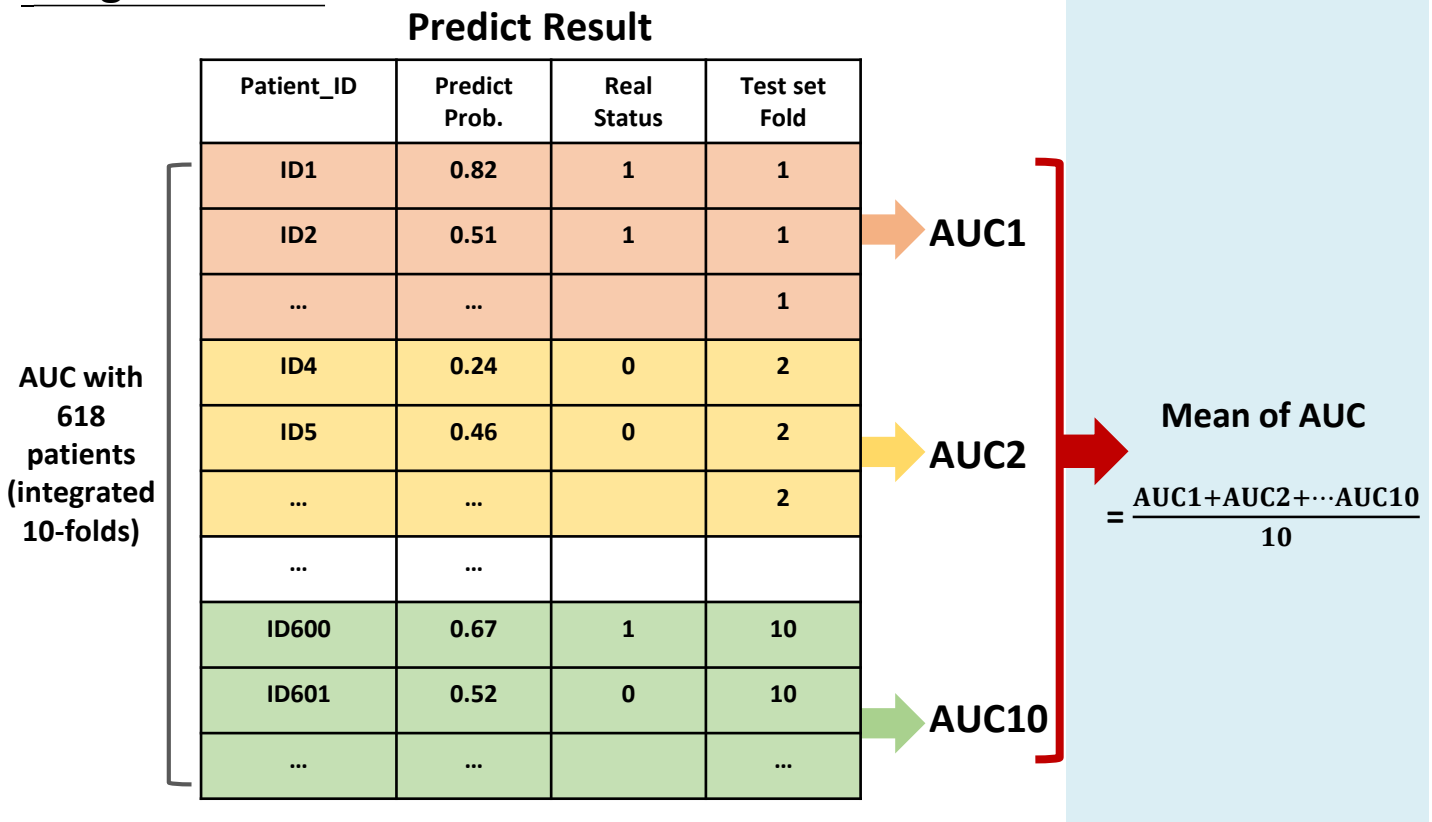

**Supplementary Figure 4. (a)** The flow chart of integrating three algorithms' results in ranking features. **(b)** Schematic diagram of how to conduct the feature ranking list. **(c)** Schematic diagram of the difference between integrated ROC and average ROC.
